# Supplementary figures and images for: In situ synthesis of methane using Ag–GDC composite electrodes in a tubular solid oxide electrolytic cell: new insight into the role of oxide ion removal
Source: Royal Society of Chemistry journal article supplement (doi:10.1039/d0se01887b), 2021-01-01

**A**

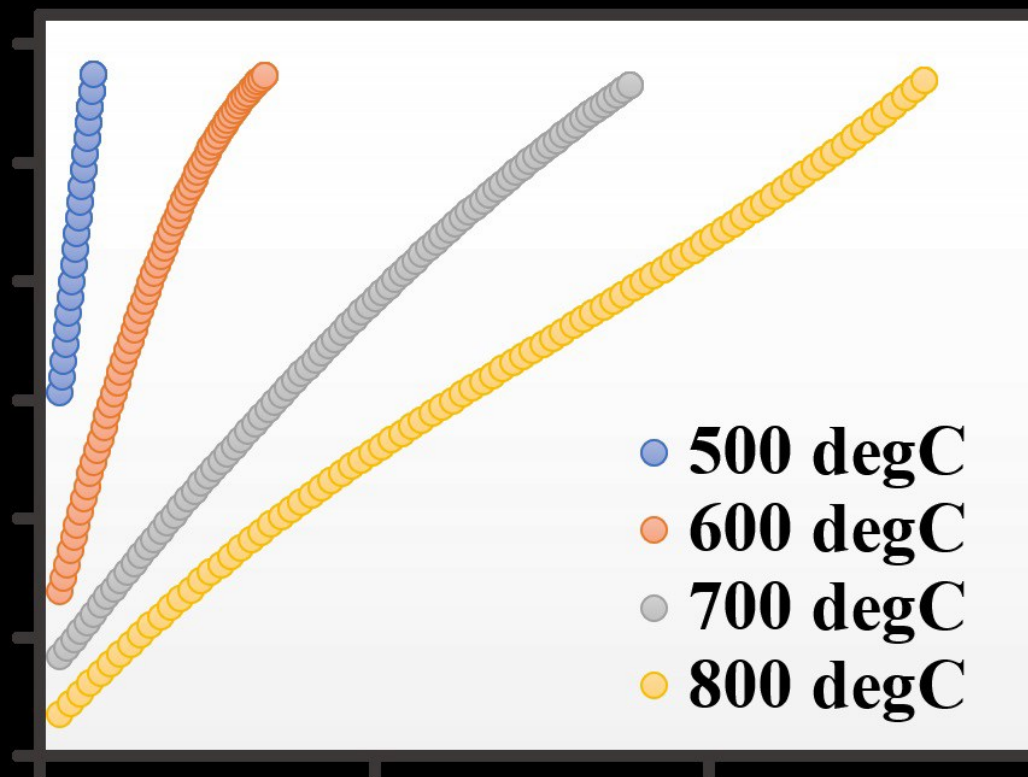

**B**

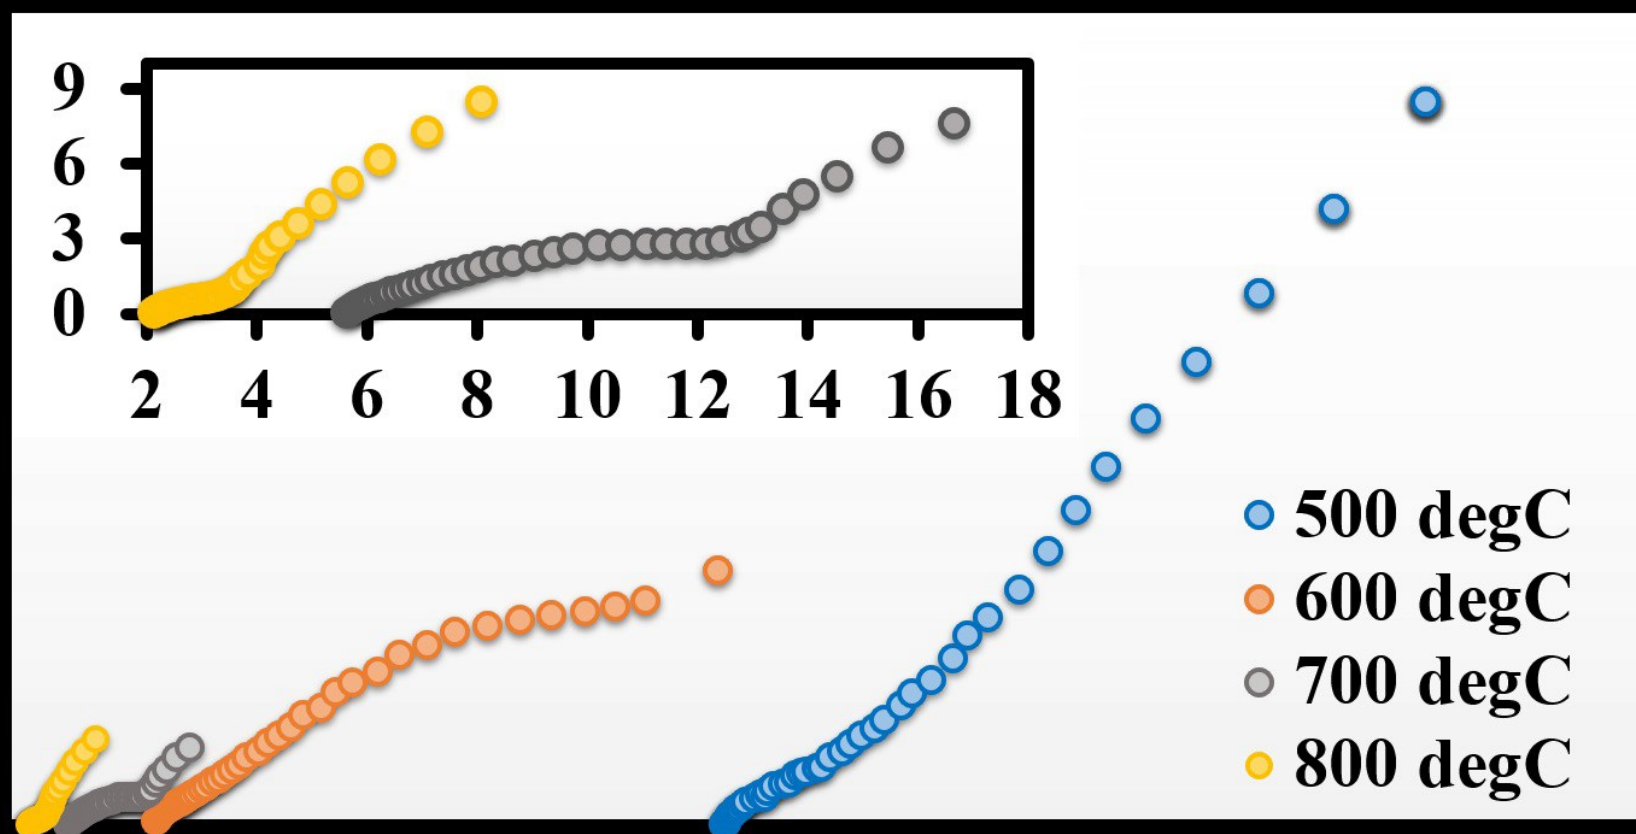

Supplement: d0se01887b2.pdf [file d0se01887b2.pdf]

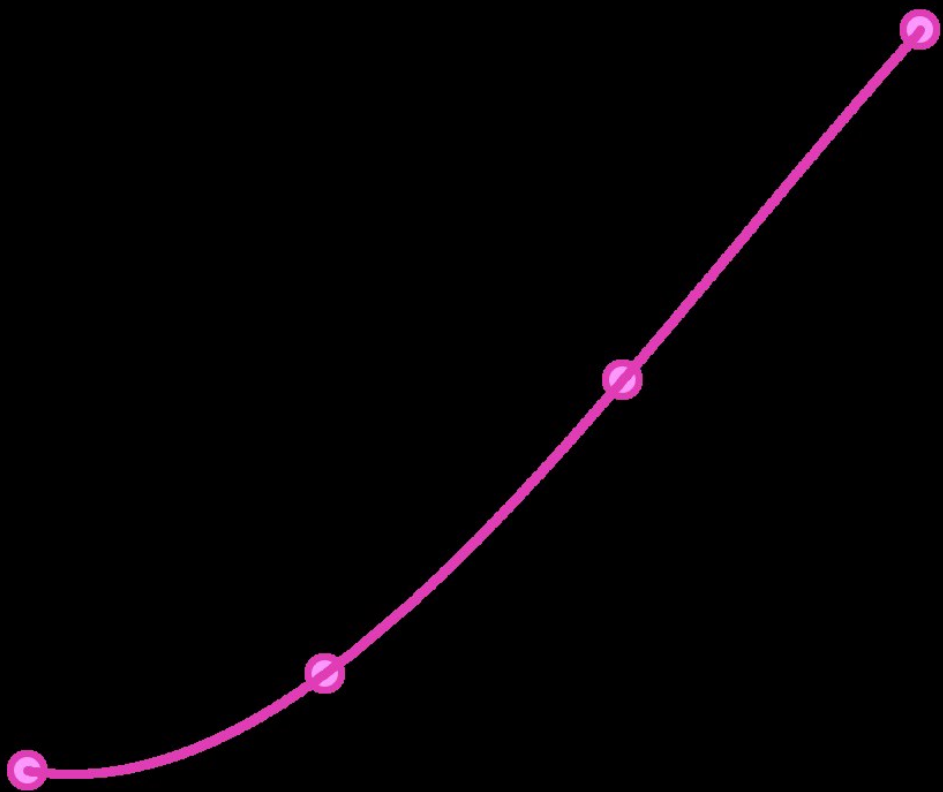

Supplement: d0se01887b3.pdf [file d0se01887b3.pdf]

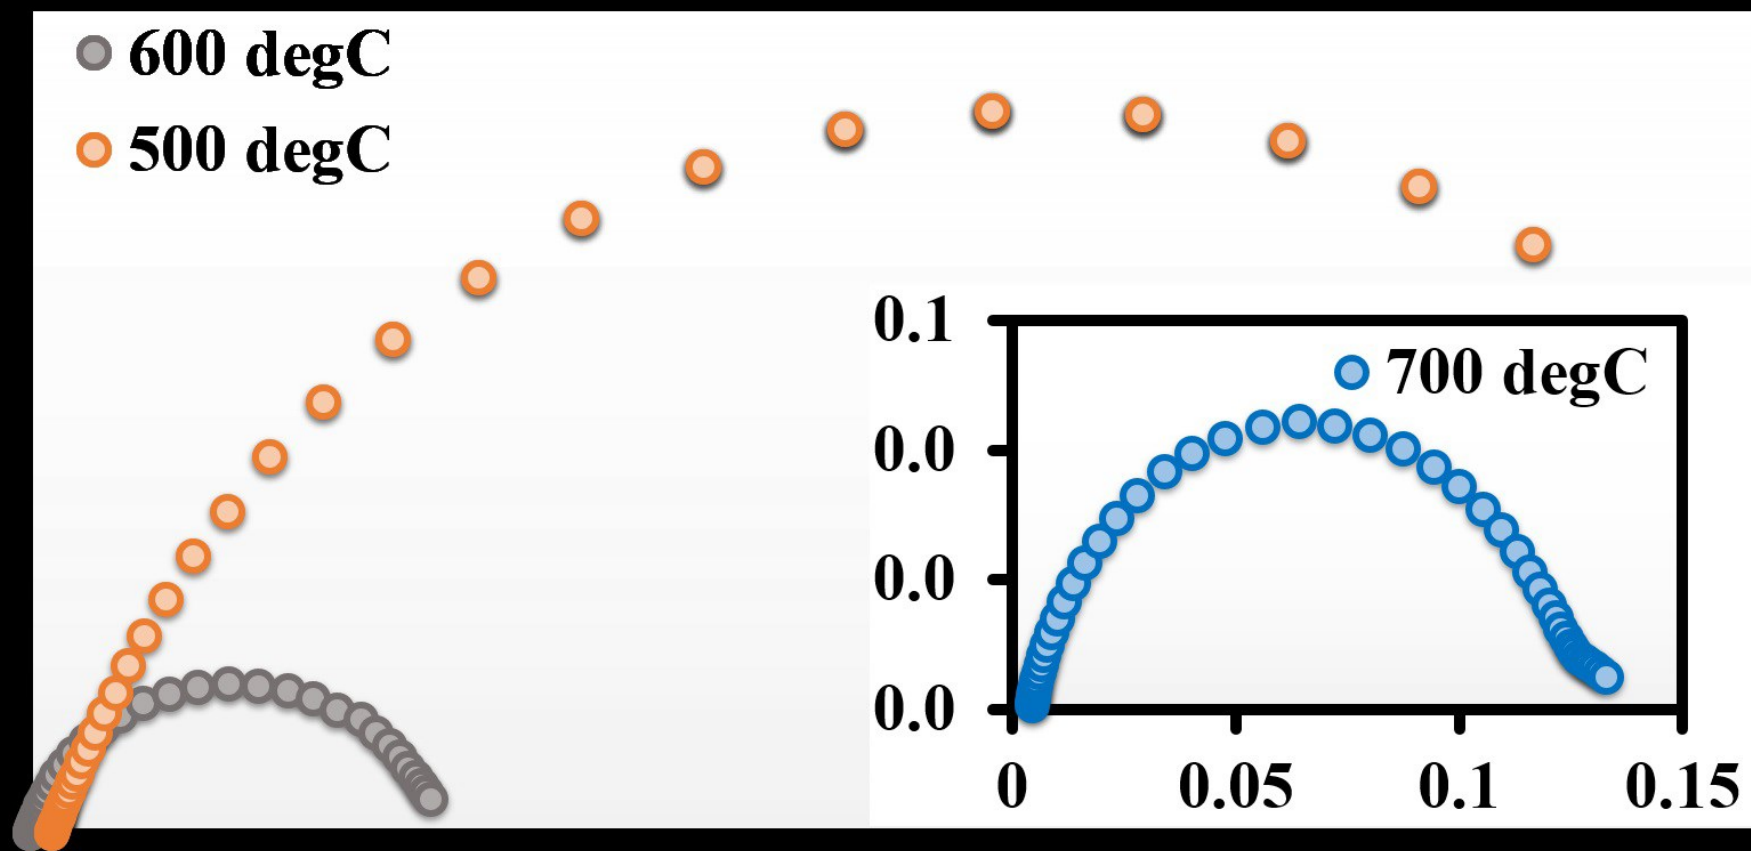

Supplement: d0se01887b4.pdf [file d0se01887b4.pdf]

**A**

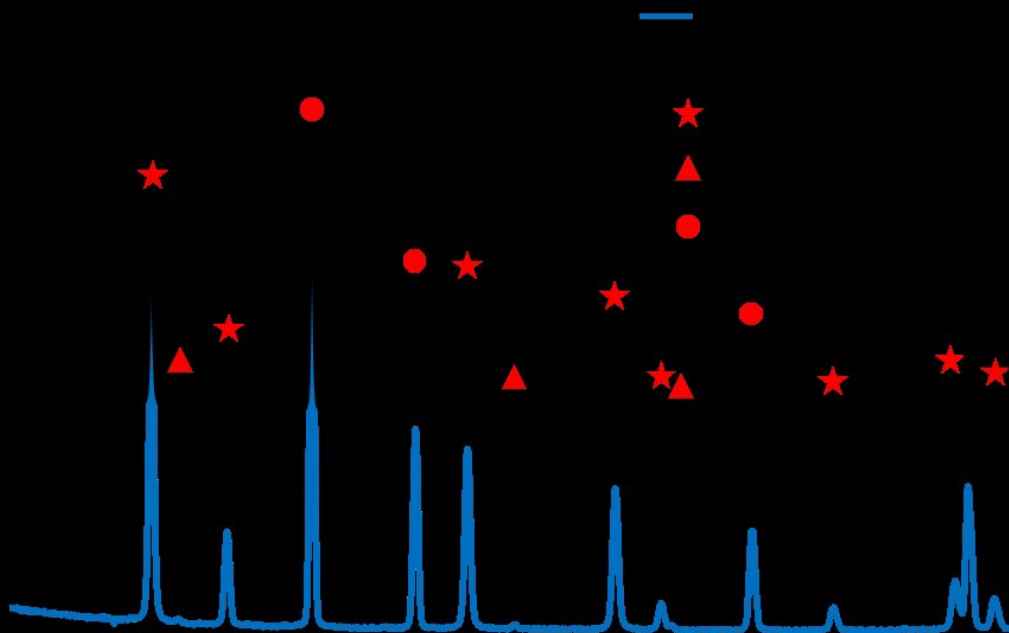

**B**

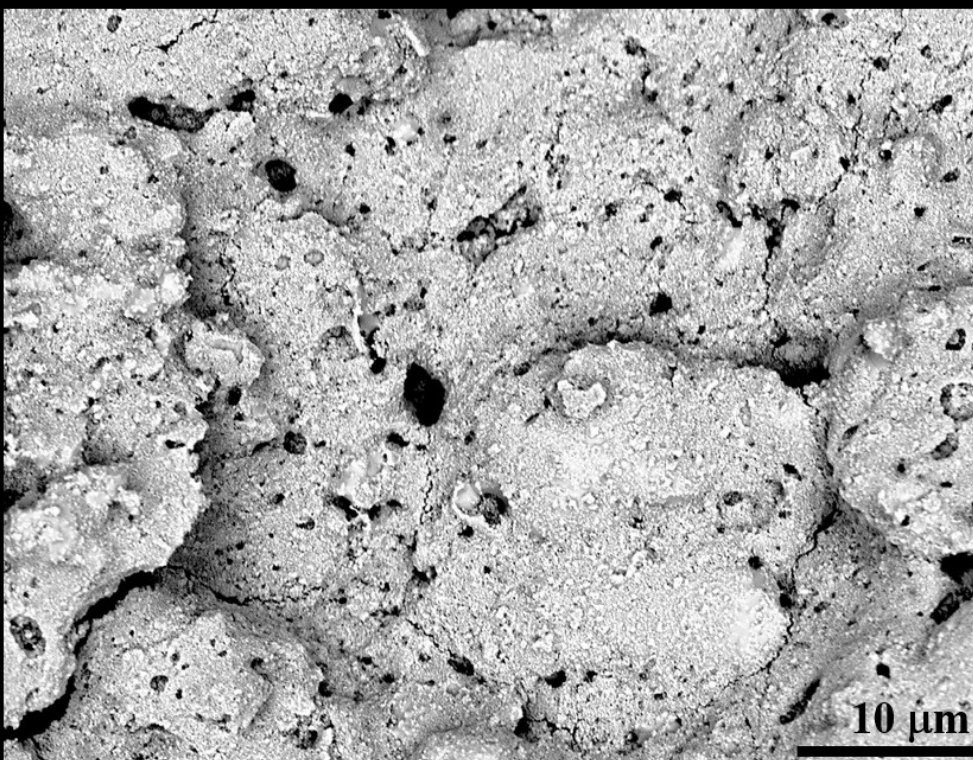

Supplement: d0se01887b5.pdf [file d0se01887b5.pdf]
